# Supplementary material for: Distinguishing Protein-Coding from Non-Coding RNAs through Support Vector Machines
Source: PubMed Central journal article supplement (PMC1449884; doi:10.1371/journal.pgen.0020029), 2006-04-28
Supplement: pgen.0020029.st001.pdf [file pgen.0020029.st001.pdf]

**Table S1: Cross-validation performance of SVMs trained on different ncRNA sets.**

| Negative part of the training set | Coding prediction |             |             | Non-coding prediction |             |             |
|-----------------------------------|-------------------|-------------|-------------|-----------------------|-------------|-------------|
|                                   | F-measure         | Specificity | Sensitivity | F-measure             | Specificity | Sensitivity |
| NONCODE-E                         | 98.2%             | 97.9%       | 98.4%       | 95.2%                 | 95.8%       | 94.7%       |
| RNAdb                             | 98.4%             | 98.0%       | 98.7%       | 87.8%                 | 90.2%       | 85.5%       |
| NONCODE-E and RNAdb               | 97.4%             | 97.1%       | 97.8%       | 94.5%                 | 95.2%       | 93.8%       |
