# Supplementary material for: Distinguishing Protein-Coding from Non-Coding RNAs through Support Vector Machines
Source: PLoS Genet. 2006 Apr 28;2(4):e29. doi: 10.1371/journal.pgen.0020029 (PMC1449884; doi:10.1371/journal.pgen.0020029)
Supplement: Table S2 — (12 KB PDF) [file pgen.0020029.st002.pdf]

**Table S2: Feature weights determined by the SVM**

| Feature                                                   | Weight  |
|-----------------------------------------------------------|---------|
| Percentage of exposed residues in the longest peptide     | -12.865 |
| Frequency of di-nucleotide GG                             | -9.346  |
| Frequency of nucleotide G                                 | -8.090  |
| Frequency of amino acid Gly in the second longest peptide | -5.197  |
| Frequency of amino acid Trp in the longest peptide        | -4.965  |
| Number of homologues for the second longest peptide       | 16.508  |
| Length of the third longest peptide                       | 27.872  |
| Number of homologues for the longest peptide              | 29.144  |
| Length of the second longest peptide                      | 38.411  |
| Length of the longest peptide                             | 45.452  |

Features with the five largest positive and negative weights are listed with their associated weights. The weights were calculated from the SVM<sup>light</sup> model file as if it were from a linear kernel, using a script from the homepage of SVM<sup>light</sup>. It should be noted that the weights are very sensitive to how the feature variables are normalized.
